## Correction

# Correction: Therapeutic Role of Ursolic Acid on Ameliorating Hepatic Steatosis and Improving Metabolic Disorders in High-Fat Diet-Induced Non-Alcoholic Fatty Liver Disease Rats

## The PLOS ONE Staff

The second and third authors are listed out of order. The correct author order is: Songtao Li, Xilu Liao, Fanyu Meng, Yemei Wang, Zonxiang Sun, Fuchuan Guo, Xiaoxia Li, Man Meng, Ying Li, Changhao Sun.

## Reference

1. Li S, Meng F, Liao X, Wang Y, Sun Z, et al. (2014) Therapeutic Role of Ursolic Acid on Ameliorating Hepatic Steatosis and Improving Metabolic Disorders in High-Fat Diet-Induced Non-Alcoholic Fatty Liver Disease Rats. PLoS ONE 9(1): e86724. doi:10.1371/journal.pone.0086724

---

**Citation:** The PLOS ONE Staff (2014) Correction: Therapeutic Role of Ursolic Acid on Ameliorating Hepatic Steatosis and Improving Metabolic Disorders in High-Fat Diet-Induced Non-Alcoholic Fatty Liver Disease Rats. PLoS ONE 9(3): e92364. doi:10.1371/journal.pone.0092364

**Published:** March 7, 2014

**Copyright:** © 2014 The PLOS ONE Staff. This is an open-access article distributed under the terms of the Creative Commons Attribution License, which permits unrestricted use, distribution, and reproduction in any medium, provided the original author and source are credited.
